# Supplementary material for: New triazolium based ionic liquid crystals
Source: Royal Society of Chemistry journal article supplement (doi:10.1039/c3tc31366b), 2014-05-21

## Supplementary Information

### New Triazolium Based Ionic Liquid Crystals

Kathrin Stappert, Derya Ünal, Bert Mallick and Anja-Verena Mudring\*

#### SAXS-patterns for compounds 1-9

Beamline BW4, DORIS III,  
Hasylab, Desy, wavelength 1.38 Å

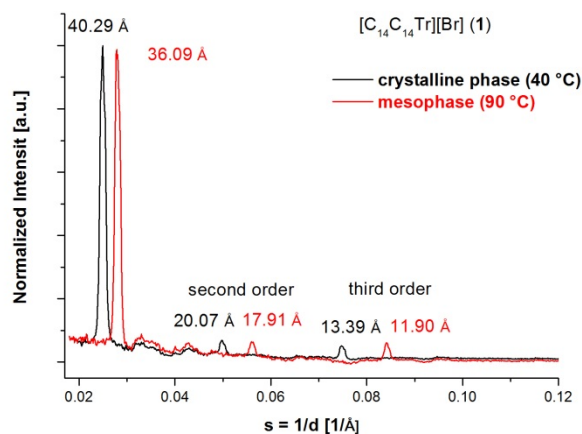

#### PXRD-patterns for compounds 1 – 9

Huber 670, Mo source, wavelength 0.7093 Å

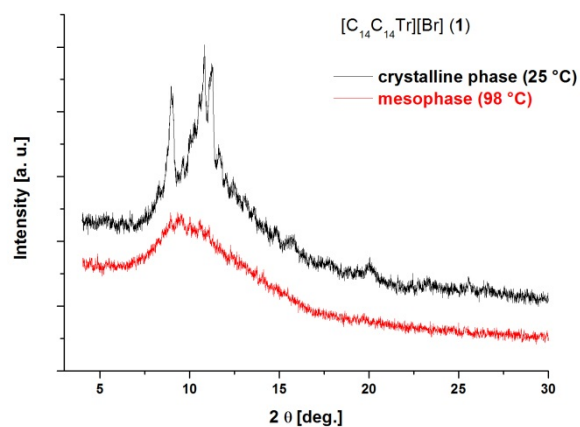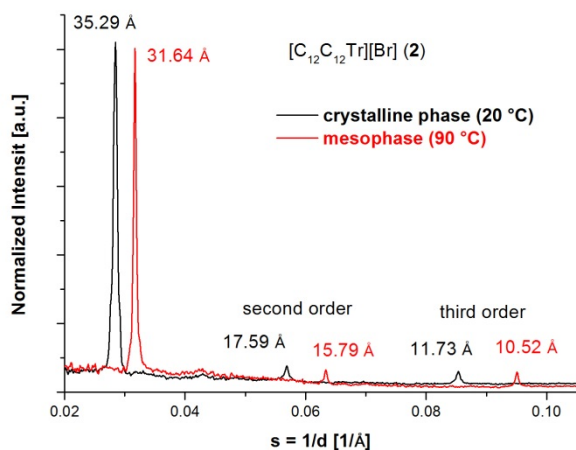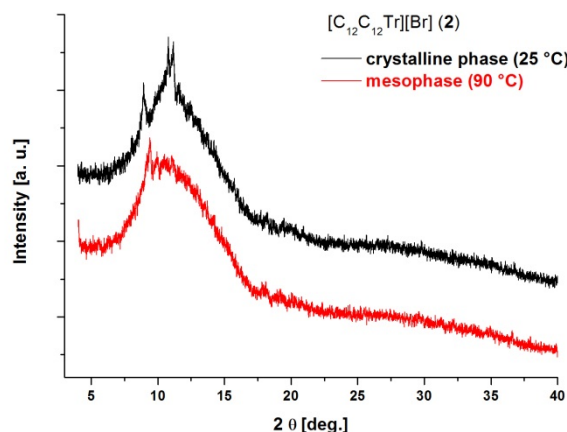

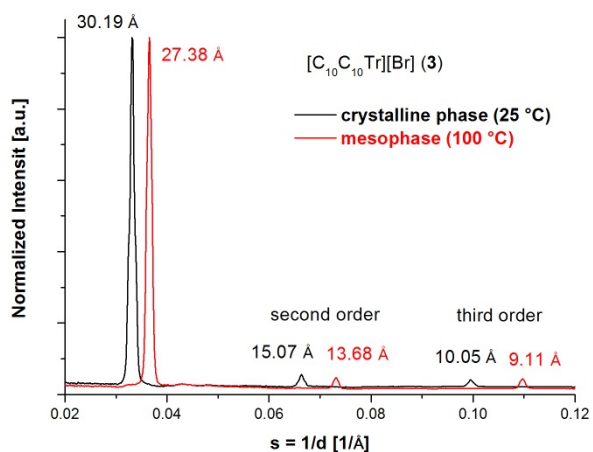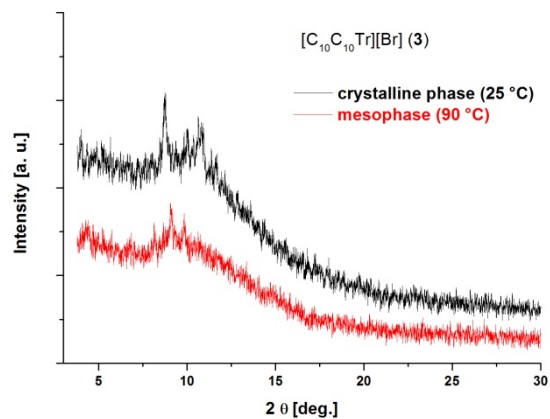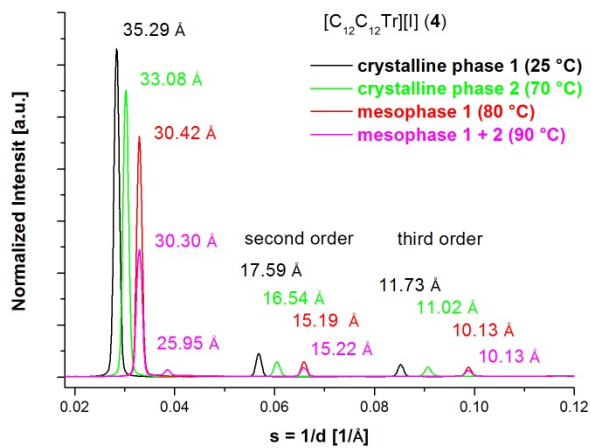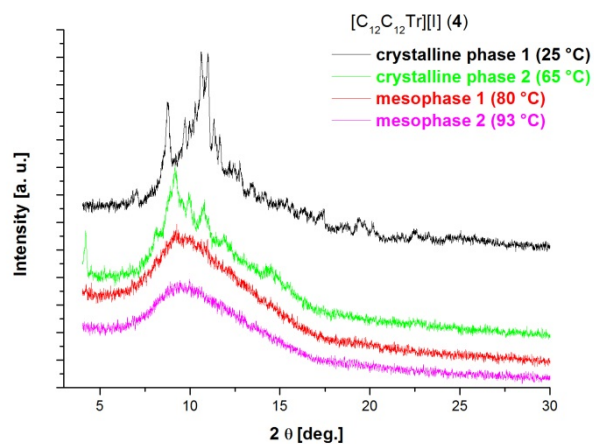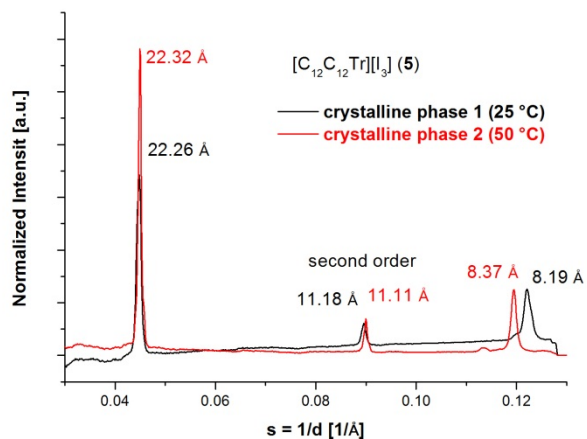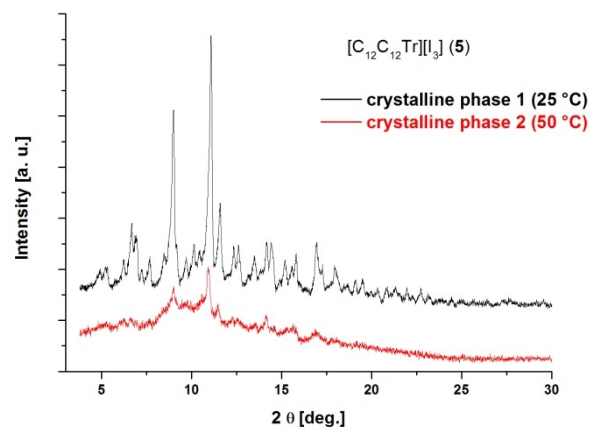

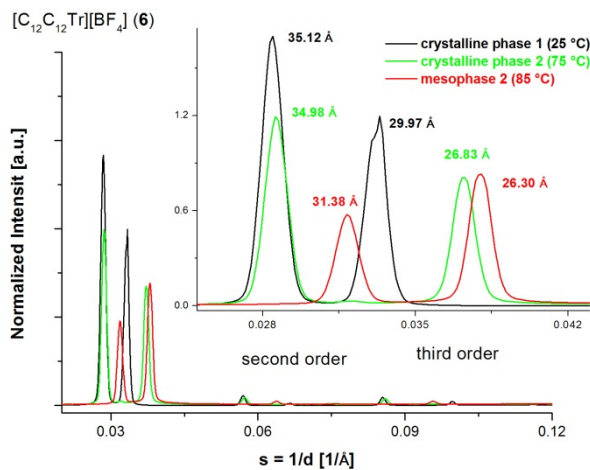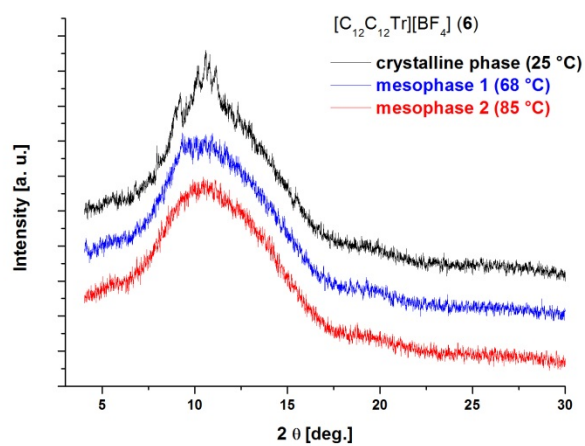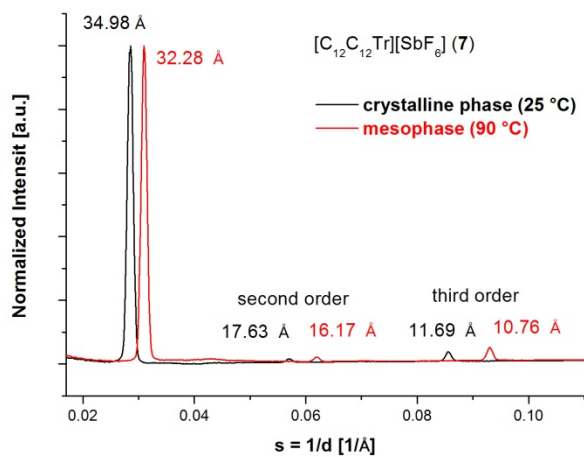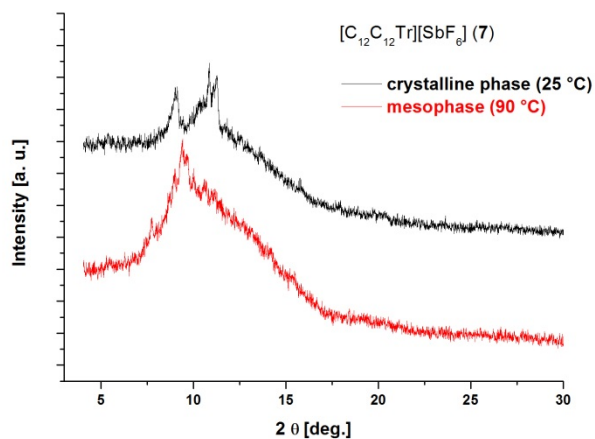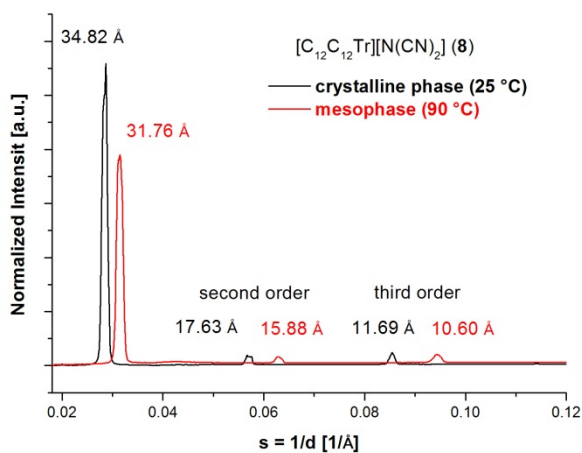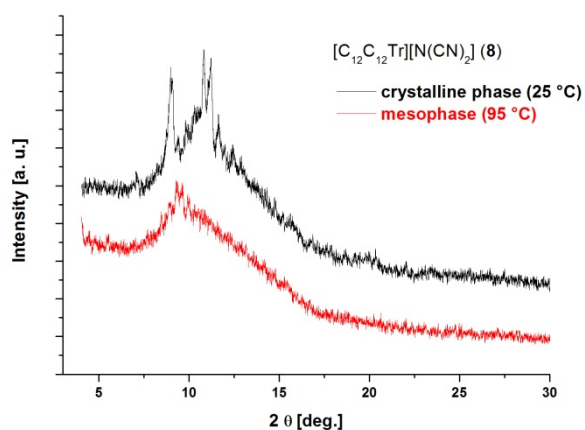

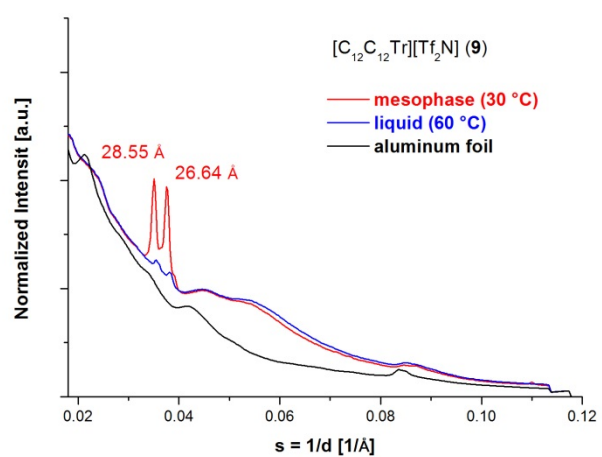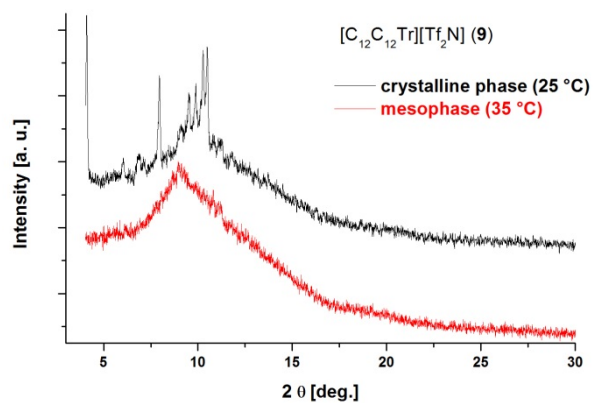

Supplement: c3tc31366b1.pdf [file c3tc31366b1.pdf]
